# Supplementary material for: The Legacy Effect in Type 2 Diabetes: Impact of Early Glycemic Control on Future Complications (The Diabetes & Aging Study)
Source: Oxford University Press journal article supplement (doi:10.2337/dc17-1144), 2018-08-13
Supplement: dc171144supplementarydata.pdf [file dc171144supplementarydata.pdf]

SUPPLEMENTARY DATA

**Table of Contents**

Supplemental Figure S1. Kaiser Permanente Diabetes Registry Patient Flow Diagram

Supplemental Table S1. Diagnostic and procedure codes and frequency of events during follow-up for outcomes

Supplemental Figure S2. Sensitivity Analysis: Right-Censoring Follow-up Time at 5 Years for Microvascular and Macrovascular Events

List of Investigators:

Neda Laiteerapong, MD, MS; Sandra A. Ham, MS; Yue Gao, MPH; Howard H. Moffet, MPH; Jennifer Y. Liu, MPH; Elbert S. Huang, MD, MPH; Andrew J. Karter, PhD

**Supplementary Figure S1. Kaiser Permanente Diabetes Registry Patient Flow Diagram**

Title: Kaiser Permanente Diabetes Registry Patient Flow Diagram Legend: None

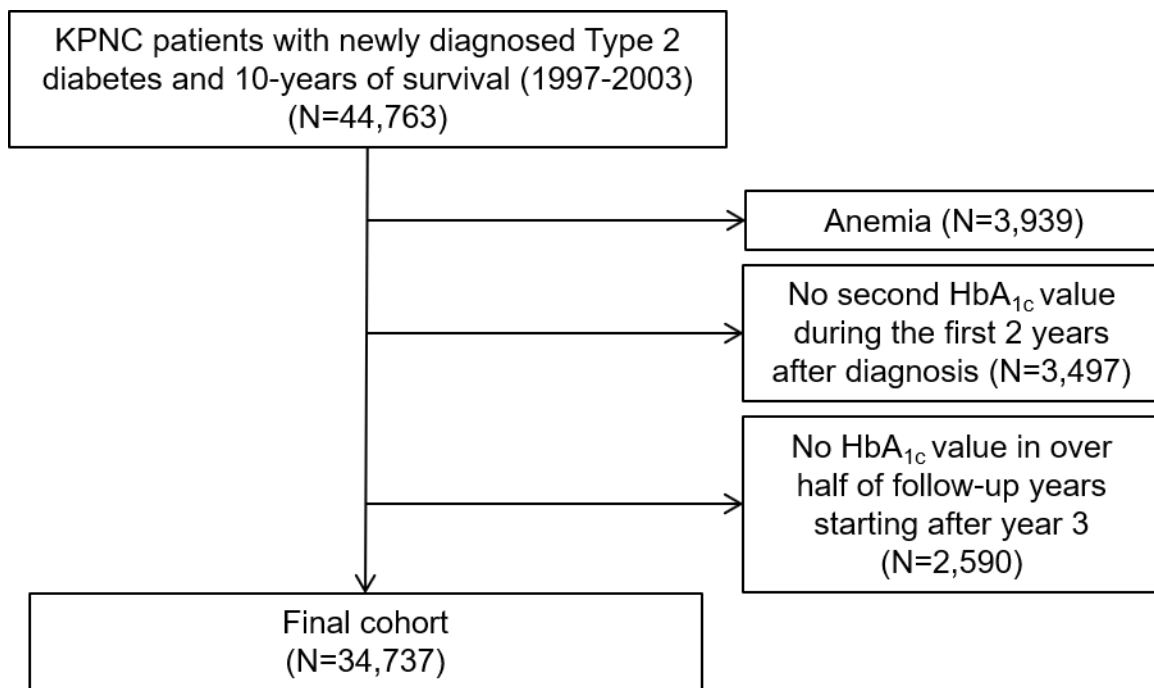

SUPPLEMENTARY DATA

**Supplementary Table S1. Diagnostic and procedure codes and frequency of events during follow-up for outcomes**

| <b>Outcomes</b>                             | <b>Data Source</b>                                                                               | <b>ICD-9 CM Codes</b>                                                                                                      | <b>CPT Codes</b>                                                                                        |
|---------------------------------------------|--------------------------------------------------------------------------------------------------|----------------------------------------------------------------------------------------------------------------------------|---------------------------------------------------------------------------------------------------------|
| <b>Advanced microvascular events</b>        |                                                                                                  |                                                                                                                            |                                                                                                         |
| End-stage renal disease (ESRD) <sup>1</sup> | Inpatient or ESRD registry                                                                       | 585.6                                                                                                                      |                                                                                                         |
| Diabetic eye disease <sup>2</sup>           | Outpatient                                                                                       | 362.02, 362.07, 369                                                                                                        | 67208, 67210, 67227, 67228                                                                              |
| Lower extremity amputation <sup>3</sup>     | Inpatient                                                                                        | 84.10-84.17, 84.18, 84.19                                                                                                  | 27598, 27880, 27881, 27882, 27884, 27886, 27888, 27889, 28800, 28805, 28820, 28825, 28810, 27290, 27295 |
| <b>Macrovascular events</b>                 |                                                                                                  |                                                                                                                            |                                                                                                         |
| Coronary artery disease <sup>4-8</sup>      | Inpatient                                                                                        | 36.01, 36.02, 36.03, 36.04, 36.05, 36.06, 36.07, 36.08, 36.09, 36.10, 36.11, 36.12, 36.13, 36.14, 36.15, 36.16, 36.19, 410 |                                                                                                         |
| Cerebrovascular disease <sup>8-11</sup>     | Inpatient                                                                                        | 38.11, 38.12, 431.x, 433.x, 434.x, 436.x.                                                                                  | 35301, 35390, 35501, 35506, 35507, 35508, 35509                                                         |
| Congestive heart failure <sup>12</sup>      | Inpatient or emergency department                                                                | 402.01, 402.11, 402.91, 428                                                                                                |                                                                                                         |
| Vascular disease <sup>13,14</sup>           | Inpatient                                                                                        | 250.7, 39.50, 440.x, 441.x, 442.x, 443.9                                                                                   |                                                                                                         |
| <b>Mortality</b>                            | California State Mortality File, Social Security Death Records, or Kaiser Administrative records |                                                                                                                            |                                                                                                         |

SUPPLEMENTARY DATA

**Supplementary Figure S2. Sensitivity Analysis: Right-Censoring Follow-up Time at 5 Years for Microvascular and Macrovascular Events**

Title: Sensitivity Analysis: Right-Censoring Follow-up Time at 5 Years for Microvascular (S2A) and Macrovascular Events (S2B)

Legend:

x-axis: Adjusted Hazard Ratio

y-axis: Early Exposure Period (Years)

black circle: HbA<sub>1c</sub> 6.5% to <7.0% (48 to <53 mmol/mol)

white square: HbA<sub>1c</sub> 7.0% to <8.0% (53 to <64 mmol/mol)

black triangle: HbA<sub>1c</sub> 8.0% to <9.0% (64 to <75 mmol/mol)

white diamond: HbA<sub>1c</sub> ≥9.0% (≥75 mmol/mol)

Abbreviations: CI: confidence interval

Footnote: Hazard ratios adjusted for year of diagnosis, age at diagnosis, gender, race/ethnicity, body mass index, systolic and diastolic blood pressure, total cholesterol, high density lipoprotein cholesterol, smoking status, HbA<sub>1c</sub> after each early exposure period, and comorbidity.

S2A. Microvascular Event Risk

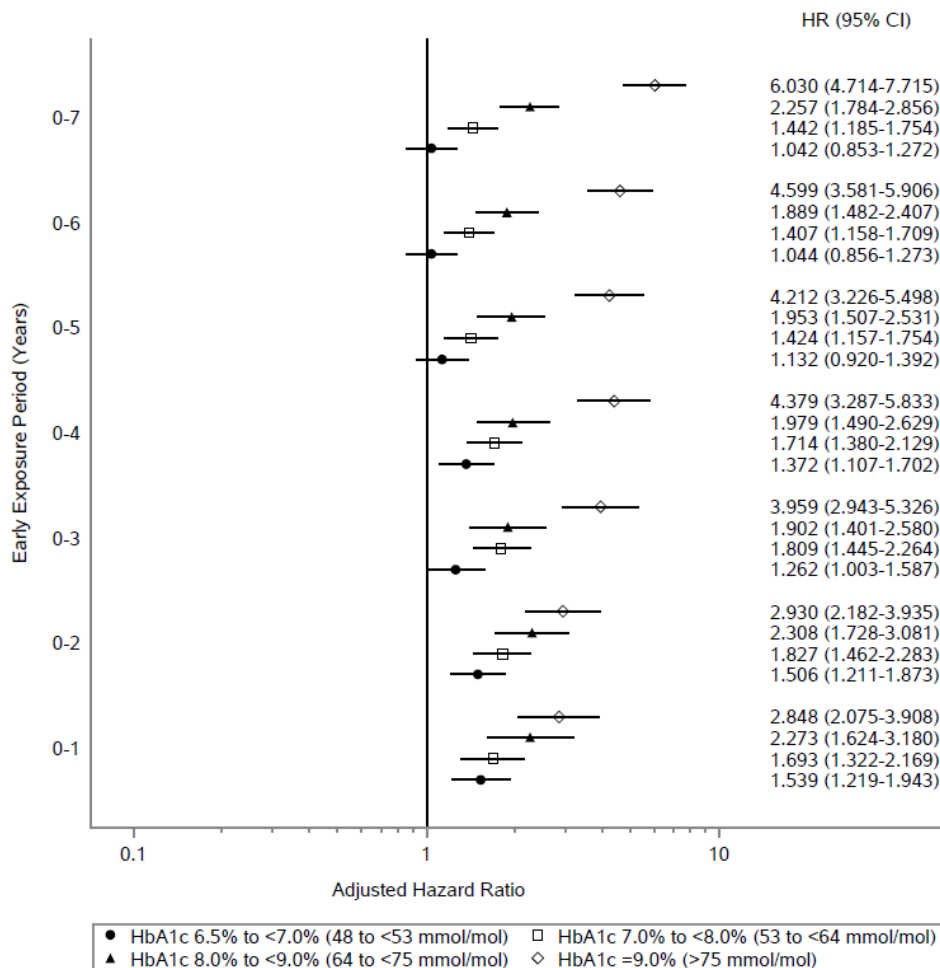

SUPPLEMENTARY DATA

S2B. Macrovascular Event Risk

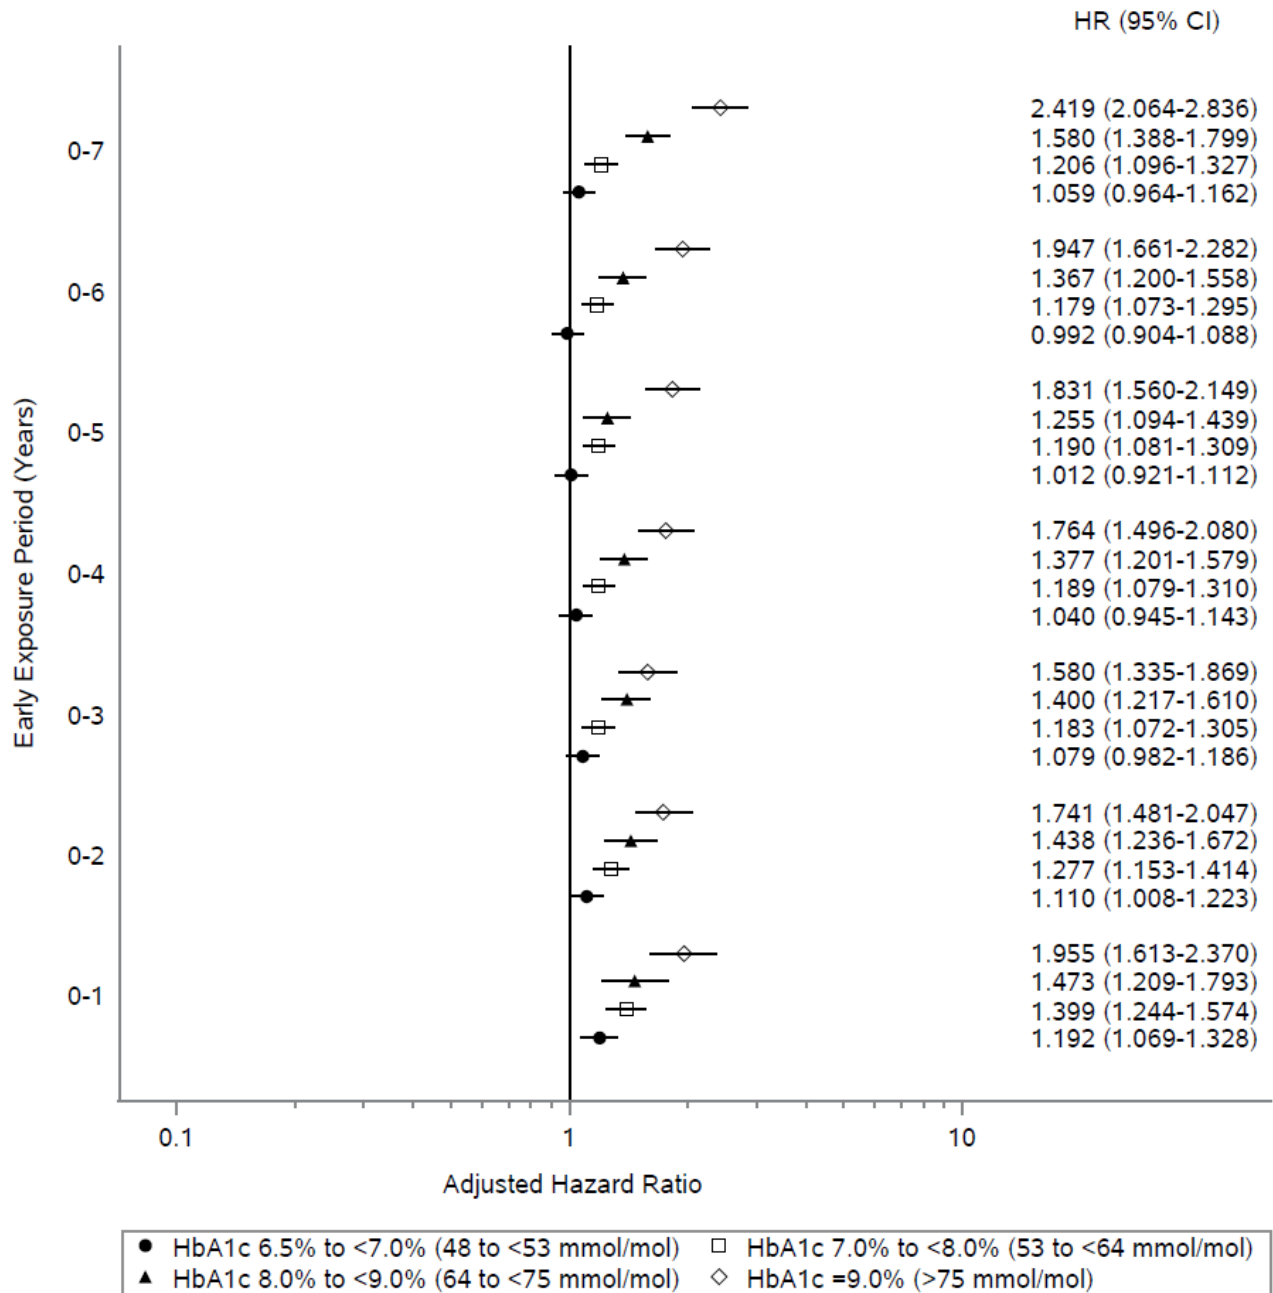

## SUPPLEMENTARY DATA

1. Rebholz CM, Coresh J, Ballew SH, et al. Kidney Failure and ESRD in the Atherosclerosis Risk in Communities (ARIC) Study: Comparing Ascertainment of Treated and Untreated Kidney Failure in a Cohort Study. *Am J Kidney Dis.* 2015;66(2):231-239.
2. Muir KW, Gupta C, Gill P, Stein JD. Accuracy of international classification of diseases, ninth revision, clinical modification billing codes for common ophthalmic conditions. *JAMA Ophthalmol.* 2013;131(1):119-120.
3. Fincke BG, Miller DR, Turpin R. A classification of diabetic foot infections using ICD-9-CM codes: application to a large computerized medical database. *BMC Health Serv Res.* 2010;10:192.
4. Brouwer ES, Napravnik S, Eron JJ, Jr., et al. Validation of Medicaid Claims-based Diagnosis of Myocardial Infarction Using an HIV Clinical Cohort. *Med Care.* 2015;53(6):e41-48.
5. Cutrona SL, Toh S, Iyer A, et al. Validation of acute myocardial infarction in the Food and Drug Administration's Mini-Sentinel program. *Pharmacoepidemiol Drug Saf.* 2013;22(1):40-54.
6. McCormick N, Lacaille D, Bhole V, Avina-Zubieta JA. Validity of myocardial infarction diagnoses in administrative databases: a systematic review. *PLoS One.* 2014;9(3):e92286.
7. Metcalfe A, Neudam A, Forde S, et al. Case definitions for acute myocardial infarction in administrative databases and their impact on in-hospital mortality rates. *Health Serv Res.* 2013;48(1):290-318.
8. Wahl PM, Rodgers K, Schneeweiss S, et al. Validation of claims-based diagnostic and procedure codes for cardiovascular and gastrointestinal serious adverse events in a commercially-insured population. *Pharmacoepidemiol Drug Saf.* 2010;19(6):596-603.
9. Boan AD, Voeks JH, Feng WW, et al. The impact of ICD-9 revascularization procedure codes on estimates of racial disparities in ischemic stroke. *J Stroke Cerebrovasc Dis.* 2014;23(10):2681-2686.
10. McCormick N, Bhole V, Lacaille D, Avina-Zubieta JA. Validity of Diagnostic Codes for Acute Stroke in Administrative Databases: A Systematic Review. *PLoS One.* 2015;10(8):e0135834.
11. Woodfield R, Grant I, Sudlow CL. Accuracy of Electronic Health Record Data for Identifying Stroke Cases in Large-Scale Epidemiological Studies: A Systematic Review from the UK Biobank Stroke Outcomes Group. *PLoS One.* 2015;10(10):e0140533.
12. Iribarren C, Karter AJ, Go AS, et al. Glycemic control and heart failure among adult patients with diabetes. *Circulation.* 2001;103(22):2668-2673.
13. Fan J, Arruda-Olson AM, Leibson CL, et al. Billing code algorithms to identify cases of peripheral artery disease from administrative data. *J Am Med Inform Assoc.* 2013;20(e2):e349-354.
14. Mell MW, Pettinger M, Proulx-Burns L, et al. Evaluation of Medicare claims data to ascertain peripheral vascular events in the Women's Health Initiative. *J Vasc Surg.* 2014;60(1):98-105.
